# Supplementary material for: Intensive Care Unit–Specific Virtual Reality for Critically Ill Patients With COVID-19: Multicenter Randomized Controlled Trial
Source: PubMed Central journal article supplement (PMC8812141; doi:10.2196/32368), 2022-01-31
Supplement: jmir_v24i1e32368_app2.pdf [file jmir_v24i1e32368_app2.pdf]

## Multimedia Appendix 2

*Table S1. Outcomes of the individual EQ-5D domains.*

Supplement to:

**Intensive Care Unit-specific Virtual Reality for Critically Ill COVID-19 Patients With COVID-19: Multicenter Randomized Controlled Trial.**

**Table S1. Outcomes of the individual EQ-5D domains.**

| <b>Baseline (3 months after hospital discharge)</b> |                   | <b>ICU-VR group</b> | <b>Control group</b> | <i>P</i> -value |
|-----------------------------------------------------|-------------------|---------------------|----------------------|-----------------|
| <b>Mobility</b>                                     | No problems       | 19 (43%)            | 17 (40%)             |                 |
|                                                     | Slight problems   | 11 (25%)            | 13 (30%)             |                 |
|                                                     | Moderate problems | 13 (30%)            | 10 (23%)             |                 |
|                                                     | Severe problems   | 1 (2%)              | 2 (5%)               |                 |
|                                                     | Extreme problems  | 0 (0%)              | 1 (2%)               |                 |
| <b>Self-care</b>                                    | No problems       | 30 (68%)            | 25 (58%)             |                 |
|                                                     | Slight problems   | 10 (27%)            | 11 (26%)             |                 |
|                                                     | Moderate problems | 4 (9%)              | 6 (26%)              |                 |
|                                                     | Severe problems   | 0 (0%)              | 0 (0%)               |                 |
|                                                     | Extreme problems  | 0 (0%)              | 1 (2%)               |                 |
| <b>Daily activities</b>                             | No problems       | 21 (47%)            | 12 (28%)             |                 |
|                                                     | Slight problems   | 8 (18%)             | 10 (23%)             |                 |
|                                                     | Moderate problems | 9 (20%)             | 12 (28%)             |                 |
|                                                     | Severe problems   | 4 (9%)              | 8 (19%)              |                 |
|                                                     | Extreme problems  | 2 (5%)              | 1 (2%)               |                 |
| <b>Pain / Discomfort</b>                            | No problems       | 10 (23%)            | 10 (23%)             |                 |
|                                                     | Slight problems   | 14 (32%)            | 11 (26%)             |                 |
|                                                     | Moderate problems | 18 (41%)            | 12 (28%)             |                 |
|                                                     | Severe problems   | 2 (5%)              | 9 (21%)              |                 |
|                                                     | Extreme problems  | 0 (0%)              | 1 (2%)               |                 |
| <b>Anxiety / Depression</b>                         | No problems       | 28 (64%)            | 17 (40%)             |                 |
|                                                     | Slight problems   | 11 (25%)            | 15 (35%)             |                 |
|                                                     | Moderate problems | 4 (9%)              | 7 (16%)              |                 |
|                                                     | Severe problems   | 1 (2%)              | 3 (7%)               |                 |
|                                                     | Extreme problems  | 0 (0%)              | 1 (2%)               |                 |
| <b>4 months after hospital discharge</b>            |                   |                     |                      |                 |
| <b>Mobility</b>                                     | No problems       | 18 (41%)            | 17 (40%)             | .712            |
|                                                     | Slight problems   | 12 (27%)            | 10 (23%)             |                 |
|                                                     | Moderate problems | 12 (27%)            | 13 (30%)             |                 |
|                                                     | Severe problems   | 2 (5%)              | 3 (7%)               |                 |
|                                                     | Extreme problems  | 0 (0%)              | 0 (0%)               |                 |
| <b>Self-care</b>                                    | No problems       | 34 (77%)            | 25 (58%)             | .119            |
|                                                     | Slight problems   | 8 (18%)             | 11 (26%)             |                 |
|                                                     | Moderate problems | 2 (5%)              | 7 (16%)              |                 |
|                                                     | Severe problems   | 0 (0%)              | 0 (0%)               |                 |
|                                                     | Extreme problems  | 0 (0%)              | 0 (0%)               |                 |
| <b>Daily activities</b>                             | No problems       | 14 (32%)            | 11 (26%)             | .512            |
|                                                     | Slight problems   | 19 (42%)            | 16 (37%)             |                 |
|                                                     | Moderate problems | 8 (18%)             | 10 (23%)             |                 |
|                                                     | Severe problems   | 3 (7%)              | 5 (12%)              |                 |
|                                                     | Extreme problems  | 0 (0%)              | 1 (2%)               |                 |

|                                          |                   |          |          |      |
|------------------------------------------|-------------------|----------|----------|------|
| <b>Pain / Discomfort</b>                 | No problems       | 8 (18%)  | 9 (21%)  | .596 |
|                                          | Slight problems   | 20 (45%) | 18 (42%) |      |
|                                          | Moderate problems | 13 (30%) | 12 (28%) |      |
|                                          | Severe problems   | 3 (7%)   | 4 (9%)   |      |
|                                          | Extreme problems  | 0 (0%)   | 0 (0%)   |      |
| <b>Anxiety / Depression</b>              | No problems       | 25 (57%) | 20 (47%) | .389 |
|                                          | Slight problems   | 10 (23%) | 15 (35%) |      |
|                                          | Moderate problems | 6 (14%)  | 6 (14%)  |      |
|                                          | Severe problems   | 1 (2%)   | 2 (5%)   |      |
|                                          | Extreme problems  | 2 (5%)   | 0 (0%)   |      |
| <b>6 months after hospital discharge</b> |                   |          |          |      |
| <b>Mobility</b>                          | No problems       | 22 (56%) | 16 (43%) | .227 |
|                                          | Slight problems   | 11 (28%) | 9 (24%)  |      |
|                                          | Moderate problems | 6 (15%)  | 10 (27%) |      |
|                                          | Severe problems   | 0 (0%)   | 2 (5%)   |      |
|                                          | Extreme problems  | 0 (0%)   | 0 (0%)   |      |
| <b>Self-care</b>                         | No problems       | 34 (87%) | 25 (68%) | .114 |
|                                          | Slight problems   | 2 (5%)   | 9 (24%)  |      |
|                                          | Moderate problems | 3 (8%)   | 3 (8%)   |      |
|                                          | Severe problems   | 0 (0%)   | 0 (0%)   |      |
|                                          | Extreme problems  | 0 (0%)   | 0 (0%)   |      |
| <b>Daily activities</b>                  | No problems       | 19 (49%) | 8 (22%)  | .149 |
|                                          | Slight problems   | 14 (36%) | 15 (41%) |      |
|                                          | Moderate problems | 4 (10%)  | 9 (24%)  |      |
|                                          | Severe problems   | 2 (5%)   | 5 (14%)  |      |
|                                          | Extreme problems  | 0 (0%)   | 0 (0%)   |      |
| <b>Pain / Discomfort</b>                 | No problems       | 13 (33%) | 10 (27%) | .886 |
|                                          | Slight problems   | 20 (51%) | 13 (35%) |      |
|                                          | Moderate problems | 4 (10%)  | 11 (30%) |      |
|                                          | Severe problems   | 2 (5%)   | 3 (8%)   |      |
|                                          | Extreme problems  | 0 (0%)   | 0 (0%)   |      |
| <b>Anxiety / Depression</b>              | No problems       | 28 (72%) | 23 (62%) | .198 |
|                                          | Slight problems   | 8 (21%)  | 6 (16%)  |      |
|                                          | Moderate problems | 2 (5%)   | 6 (16%)  |      |
|                                          | Severe problems   | 1 (3%)   | 2 (5%)   |      |
|                                          | Extreme problems  | 0 (0%)   | 0 (0%)   |      |

Outcomes of the five domains of the EQ-5D. Values are presented as absolute number (relative frequency) of patients reporting no, slight, moderate, severe, or extreme problems. P-values were calculated using a logistic mixed model, with randomization and baseline score as independent variables.
